# Supplementary material for: Three-dimensional hotspot structures constructed from nanoporous gold with a V-cavity and gold nanoparticles for surface-enhanced Raman scattering
Source: Royal Society of Chemistry journal article supplement (doi:10.1039/d4ay00348a), 2024-01-01
Supplement: d4ay00348a1.pdf [file d4ay00348a1.pdf]

## Supporting Information

### **Three-dimensional hotspot structures constructed from nanoporous gold with V-cavity and gold nanoparticles for surface-enhanced Raman scattering**

Yang Xu,<sup>a</sup> Yan Wu,<sup>b</sup> Jianjun Wei,<sup>\*a</sup> Yuanyu Zhao,<sup>b</sup> Peili Xue,<sup>b</sup>

<sup>a</sup> Institute of Atomic and Molecular Physics, Sichuan University, Chengdu 610065, China.

<sup>b</sup> Sichuan Science City Hospital, Mianyang 621000, China.

\*Corresponding Authors:

Jianjun Wei: [weijianjun@scu.edu.cn](mailto:weijianjun@scu.edu.cn)

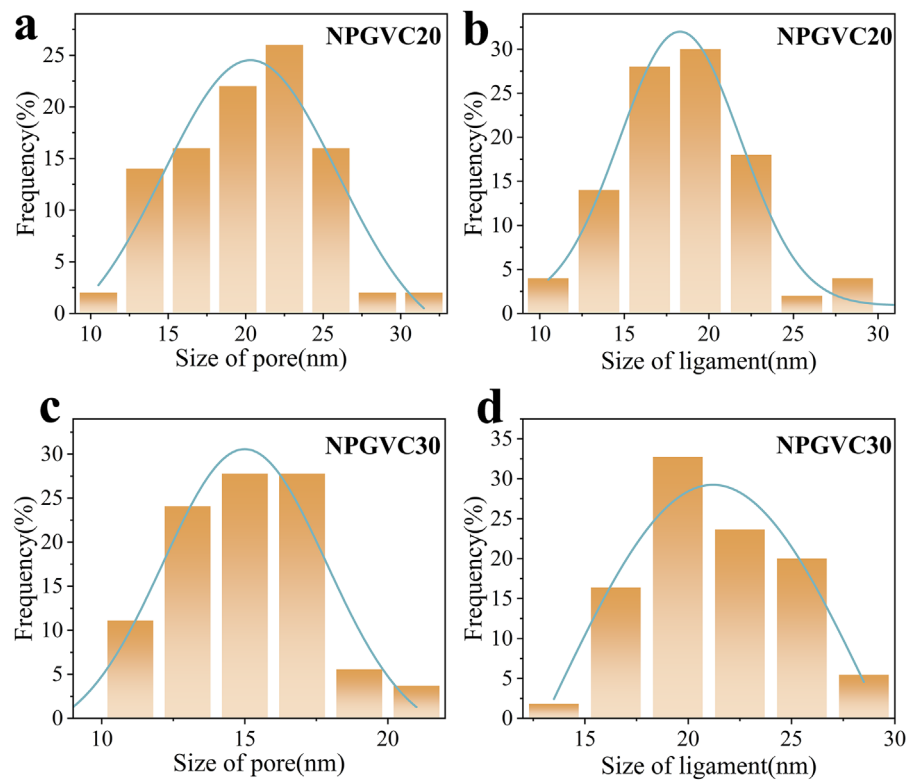

**Figure S1.** Statistical results of feature size for different NPGVC structure. a, c) The size of pore. b, d) The size of ligament.

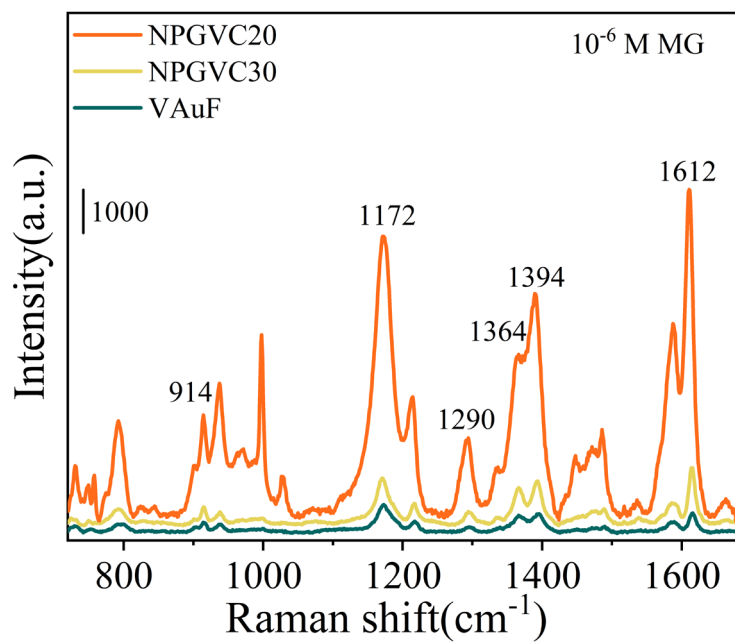

**Figure S2.** SERS spectra of 10<sup>-6</sup> M MG molecules on the NPGVC20, NPGVC30, and VAuF.

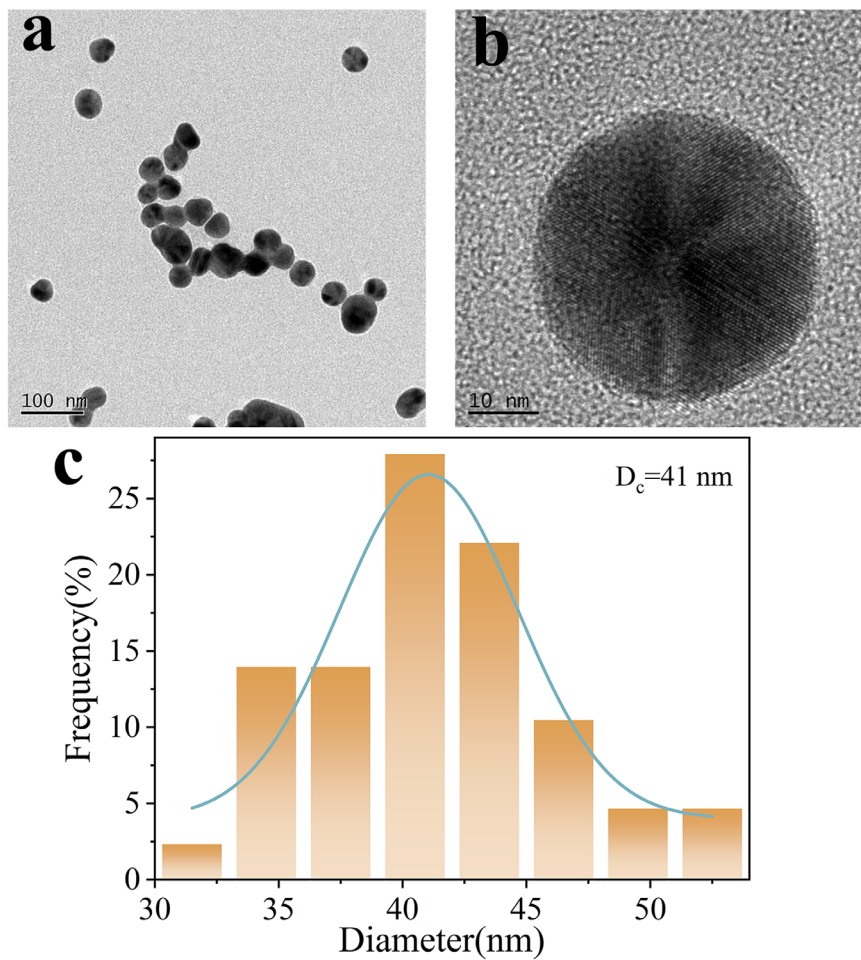

**Figure S3.** a) TEM images of the prepared AuNPs. b) Statistical results of particle size for AuNPs.

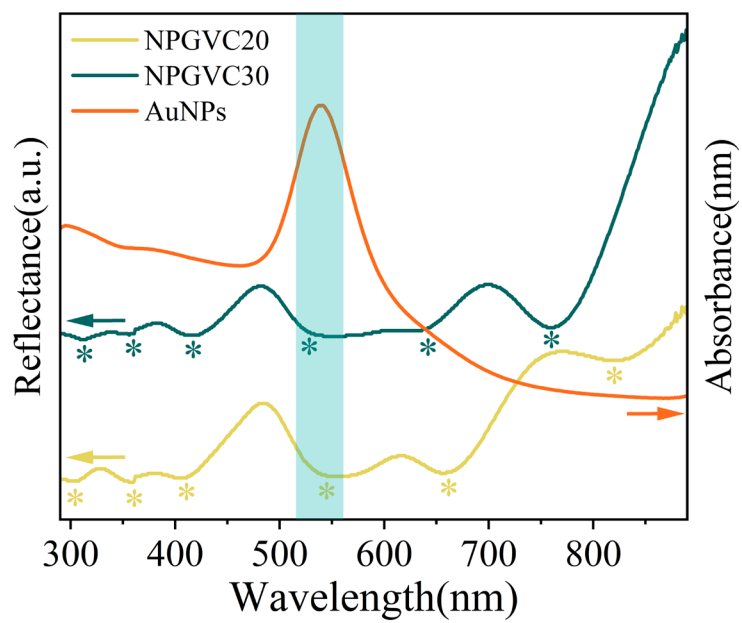

**Figure S4.** Reflectance spectra of NPGVC20 and NPGVC30; absorbance spectra of AuNPs.

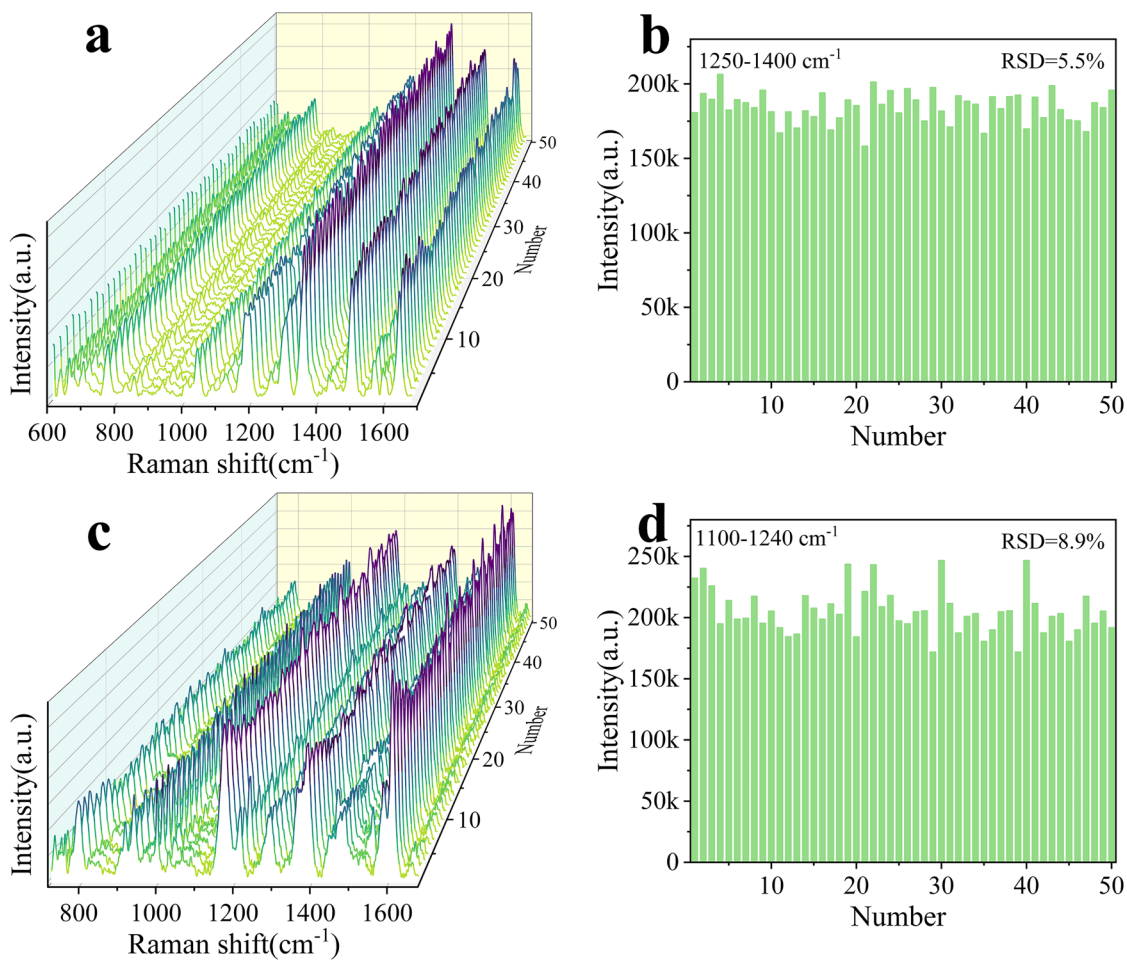

**Figure S5.** a) SERS spectra of  $10^{-7}$  M R6G obtained at 50 randomly chosen spots on NPGVRC substrate. b) The corresponding relative standard deviation (RSD) values of a) for the integral area in the  $1250\sim 1400\text{ cm}^{-1}$ . c) SERS spectra of  $10^{-7}$  M MG obtained at 50 randomly chosen spots on NPGVRC substrate. d) The corresponding RSD values of c) for the integral area in the  $1100\sim 1240\text{ cm}^{-1}$ .

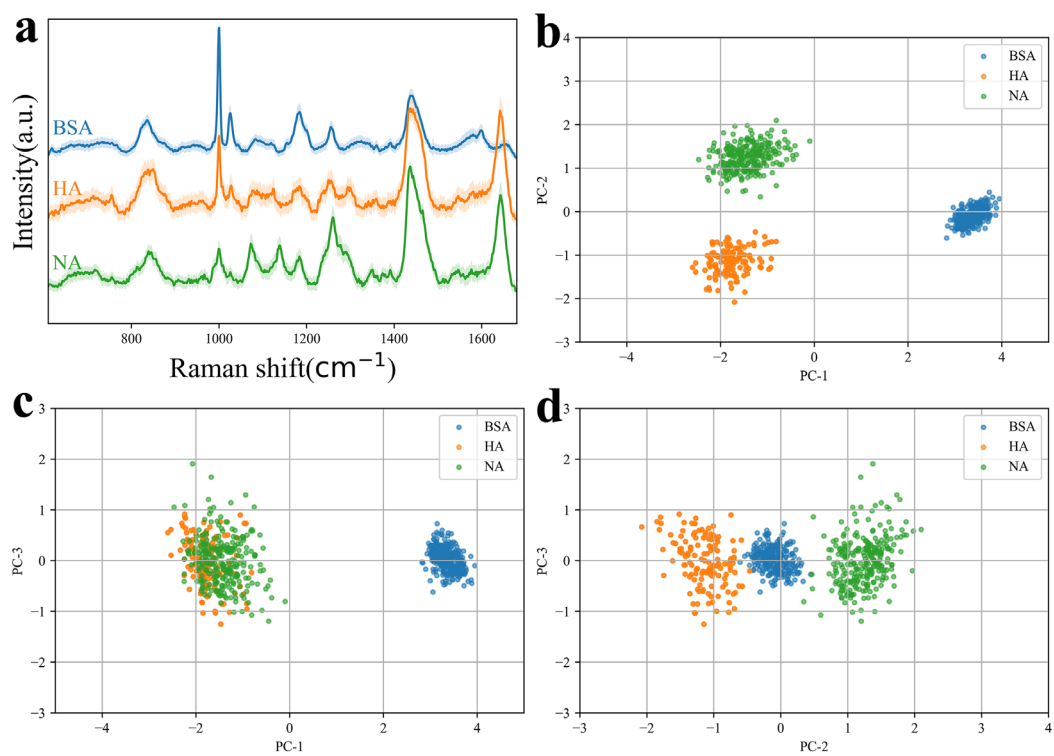

**Figure S6.** a) SERS spectra of HA, NA, and BSA detected by NPGVRC substrate. b-d) 2D projections of the PCA score plots for the SERS spectra of HA, NA, and BSA.

**Table S1.** Raman band assignment for the R6G molecule in experiment and theory.<sup>1</sup>

| Vibrational mode                                           | Theory (cm <sup>-1</sup> ) | Experiment (cm <sup>-1</sup> ) |
|------------------------------------------------------------|----------------------------|--------------------------------|
| C–C xanthene/phenyl rings bending                          | 615                        | 611                            |
| C–H out-of-plane bending                                   | 771                        | 772                            |
| C–H in-of-plane bending                                    | 1175                       | 1184                           |
| C–O–C stretching in COOC <sub>2</sub> H <sub>5</sub> group | 1307                       | 1304                           |
| C–C stretching in xanthene ring                            | 1351                       | 1360                           |
| C–C stretching in xanthene ring                            | 1505                       | 1502                           |
| C–C stretching in the phenyl ring                          | 1577                       | 1570                           |
| C–C stretching in xanthene ring                            | 1652                       | 1644                           |



**Table S2.** Raman band assignment for the MG molecule in experiment and theory.<sup>2-4</sup>

| Vibrational mode               | Theory (cm <sup>-1</sup> ) | Experiment (cm <sup>-1</sup> ) |
|--------------------------------|----------------------------|--------------------------------|
| Ring skeletal radial vibration | 918                        | 914                            |
| Aromatic C–H bending in-plane  | 1172                       | 1172                           |
| Aromatic C–H bending in-plane  | 1289                       | 1290                           |
| N–C stretching                 | 1360                       | 1364                           |
| C–C and C–H in-plane motions   | 1395                       | 1394                           |
| N–C bonding and C–C stretching | 1616                       | 1612                           |

**Table S3.** Raman band assignment of HA, NA normal spectra, HA and NA SERS spectra.<sup>5-12</sup> Ile: Isoleucine, Trp: Tryptophan, Tyr: Tyrosine, Val: Valine, Ser: Serine, His: Histidine, Glu: Glutamic, Thr: Threonine, Pro: Proline, Asp: Aspartic acid, Phe: Phenylalanine, Arg: Arginine, Gly: Glycine, Lys: Lysine, Met: Methionine, Cys: Cysteine, Ala: Alanine, Gln: glutamine, Gal: Galactose, Man: Mannose, GlcNAc: N-acetyl-D-glucosamine, Fuc: Fucose, Glc: Glucose, str: stretch vibration, def: deformation vibration, ben: bending vibration, sym: symmetrical, asym: asymmetrical.

| Raman shift (cm <sup>-1</sup> ) |           |         |         | Possible band assignment          |                                                 |          | Ref.    |
|---------------------------------|-----------|---------|---------|-----------------------------------|-------------------------------------------------|----------|---------|
| HA normal                       | NA normal | HA SERS | NA SERS | Backbone                          | Side-chain                                      | Glycan   |         |
| 619                             | 619       | 620     |         | Amide IV                          |                                                 |          | 5, 6    |
| 642                             | 642       | 642     |         |                                   | C-S str                                         |          | 5       |
| 710                             | 710       |         |         |                                   | C-S str trans, Ile                              |          | 5, 7    |
| 760                             | 760       | 756     | 757     | Amide V                           | Trp                                             |          | 5-8     |
| 830                             | 830       | 830     | 830     | C-C str                           | Tyr, Val, Ile                                   | Gal, Man | 7-11    |
| 839                             | 843       | 840     | 841     | C-C str                           | Tyr, Ser, Val, His                              |          | 7, 8    |
| 852                             | 850       | 854     | 855     | C-C str                           | Ile, Tyr, Ala                                   |          | 7, 8    |
| 885                             | 884       | 888     | 884     |                                   | Trp, Glu, Thr                                   | Man      | 7, 8    |
| 1004                            | 1004      | 1001    | 1001    |                                   | sym. ring C-C str, Phe                          |          | 7, 8    |
| 1015                            | 1015      | 1015    | 1015    | C-C str                           |                                                 |          | 7, 8    |
| 1031                            | 1031      | 1029    | 1028    |                                   | ring CH def, Phe, Gly                           |          | 7, 8    |
| 1064                            | 1064      |         |         | C-N str                           | Glu, Ser                                        |          | 7, 8    |
| 1075                            | 1075      | 1077    | 1074    | C-N str                           | Ile, His, Arg, Glu, Asp                         | Man      | 7, 8    |
| 1130                            | 1128      | 1126    |         | C-N str                           | NH <sub>3</sub> <sup>+</sup> def, Trp, Ile, Gly | GlcNAc   | 5, 7, 8 |
| 1138                            | 1139      |         | 1137    | C-N str                           | Trp, Ile, Gly                                   |          | 7, 8    |
| 1178                            | 1176      | 1179    | 1179    |                                   | Tyr, His                                        |          | 7, 8    |
| 1208                            | 1208      |         |         |                                   | Tyr, Phe                                        |          | 7, 8    |
| 1245                            | 1246      | 1245    | 1246    | Amide III ( $\beta$ -sheet, coil) | CH <sub>2</sub> ben, Ile                        |          | 5, 12   |
| 1265                            | 1263      | 1260    | 1262    | Amide III ( $\alpha$ -helix)      | CH <sub>2</sub> ben, Ile                        |          | 5, 11   |
| 1300                            | 1301      | 1302    | 1302    | Amide III ( $\beta$ -turn)        | CH <sub>2</sub> ben, Glu, Cys                   | Gln      | 5, 12   |
|                                 |           | 1354    | 1352    | C-H def                           |                                                 | GlcNAc   | 7, 8    |
|                                 |           | 1389    | 1392    |                                   | COO <sup>-</sup> sym str                        |          | 7, 8    |
| 1445                            | 1442      | 1444    | 1438    | CH <sub>2</sub> def               | Gly, Leu, Pro, Trp                              | Hln      | 5       |
| 1468                            | 1468      | 1471    | 1467    |                                   | Ala                                             |          | 7, 8    |
| 1554                            | 1553      | 1548    | 1546    | Amide II                          | Trp                                             |          | 5, 7, 8 |
| 1655                            | 1654      | 1644    | 1644    | Amide I                           |                                                 |          | 5, 12   |

## Reference

- 1 H. Watanabe, N. Hayazawa, Y. Inouye and S. Kawata, *J. Phys. Chem. B*, 2005, **109**, 5012–5020.
- 2 C. Tsai, J. Lin and C. Lin, *Talanta*, 2007, **72**, 368–372.
- 3 Y. Zhao, Y. Tian, P. Ma, A. Yu, H. Zhang and Y. Chen, *Anal. Methods*, 2015, **7**, 8116–8122.
- 4 T. T. K. Chi, N. T. Le, B. T. T. Hien, D. Q. Trung and N. Q. Liem, *Commun. Phys.*, 2017, **26**, 261.
- 5 A. Rygula, K. Majzner, K. M. Marzec, A. Kaczor, M. Pilarczyk and M. Baranska, *J. Raman Spectrosc.*, 2013, **44**, 1061–1076.
- 6 R. Tuma, *J. Raman Spectrosc.*, 2005, **36**, 307–319.
- 7 G. Zhu, X. Zhu, Q. Fan and X. Wan, *Spectrochim. Acta. A. Mol. Biomol. Spectrosc.*, 2011, **78**, 1187–1195.
- 8 J. De Gelder, K. De Gussem, P. Vandenabeele and L. Moens, *J. Raman Spectrosc.*, 2007, **38**, 1133–1147.
- 9 E. Wiercigroch, E. Szafraniec, K. Czamara, M. Z. Pacia, K. Majzner, K. Kochan, A. Kaczor, M. Baranska and K. Malek, *Spectrochim. Acta. A. Mol. Biomol. Spectrosc.*, 2017, **185**, 317–335.
- 10 P. H. Arboleda and G. R. Loppnow, *Anal. Chem.*, 2000, **72**, 2093–2098.
- 11 G. Cerchiaro, A. C. Sant’Ana, M. L. A. Temperini and A. M. Da Costa Ferreira, *Carbohydr. Res.*, 2005, **340**, 2352–2359.
- 12 J. Kong and S. Yu, *Acta Biochim. Biophys. Sin.*, 2007, **39**, 549–559.
